# Supplementary material for: Ultrasound-assisted directional freezing enables high-performance hydrogel evaporators with tunable microchannels for solar desalination
Source: Royal Society of Chemistry journal article supplement (doi:10.1039/d5ta06164d), 2025-01-01
Supplement: d5ta06164d1.pdf [file d5ta06164d1.pdf]

1 Supporting information (SI) for

2

3 **Ultrasound-Assisted Directional Freezing Enables High-Performance**  
4 **Hydrogel Evaporators with Tunable Microchannels for Solar**  
5 **Desalination**

6

7 Shanbin Zhang<sup>1</sup>, Hang Su<sup>1</sup>, Limei Li<sup>1</sup>, Jianbin Ma<sup>1</sup>, Zhenyu Wang<sup>1</sup>, Fangqiu Hu<sup>1</sup>,  
8 Yujun Sun<sup>1</sup>, Jitian Song<sup>1,\*</sup>

9

10 <sup>1</sup>Tianjin Key Laboratory of Integrated Design and On-line Monitoring for Light  
11 Industry & Food Machinery and Equipment, College of Mechanical Engineering,  
12 Tianjin University of Science and Technology, Tianjin, 300222, China

13

14 \*Corresponding authors.

15 *E-mail addresses:* songjt@tust.edu.cn

16

17

## 18 **Preparation of PVA/CS Precursor Solution (for a 100 mL Batch)**

19       To prepare the PVA/CS precursor solution (taking 100 mL as an example), a 9  
20 wt% PVA aqueous solution was first prepared by dissolving 2.25 g of PVA in 22.75  
21 mL of deionized water under magnetic stirring at 90 °C for 1 hour until completely  
22 dissolved. Then, a 2 wt% CS solution was prepared by adding 1.5 g of low-molecular-  
23 weight chitosan to 70 mL of water, followed by the addition of 3.7 mL of phosphoric  
24 acid. The mixture was stirred at 80 °C for 30 minutes until fully dissolved, after which  
25 0.75 mL of phytic acid (50 wt% aqueous solution) was added and stirring was continued  
26 until homogeneous. The PVA and CS solutions were then mixed thoroughly in a mass  
27 ratio of 1:3 (9 wt% PVA solution to 2 wt% CS solution). Subsequently, 1.0 g of  
28 conductive CB powder was added to the mixed solution and stirred thoroughly,  
29 followed by ultrasonic treatment to ensure uniform dispersion. Finally, 50 wt%  
30 glutaraldehyde solution was added to initiate crosslinking, and the mixture was left  
31 undisturbed for 30 minutes to obtain the final PVA/CS precursor solution.

## 32 **Characterization**

33       The surface morphology of freeze-dried hydrogel samples was characterized using  
34 a scanning electron microscope (SEM, SU3800, Hitachi, Japan). Elemental analysis of  
35 the hydrogels was conducted using an energy-dispersive X-ray spectrometer (EDS,  
36 Oxford Ultim Max65, UK). The pore size and its distribution were analyzed with  
37 ImageJ software. The wettability of the hydrogels was evaluated using a contact angle  
38 goniometer (OCA15EC, Dataphysics, Germany) with 5  $\mu$ L of deionized water as the  
39 test droplet. The light absorption properties of the hydrogels were precisely measured  
40 using a UV-Vis-NIR spectrophotometer (SHIMADZU UV-3600i Plus, Japan)  
41 equipped with an integrating sphere over the wavelength range of 250-2500 nm. Metal  
42 ion concentrations in the collected water were determined by inductively coupled  
43 plasma optical emission spectrometry (ICP-OES, PerkinElmer Optima 8000). Thermal  
44 behaviors such as melting and evaporation of the hydrogels were studied using  
45 differential scanning calorimetry (DSC, TA-Discovery, USA), where the sample was

46 heated from 25 °C to 130 °C at a rate of 5 °C /min under a nitrogen atmosphere. The  
47 state of water molecules in the hydrogel was further analyzed via Raman spectroscopy  
48 (HORIBA LabRAM HR Evolution, Japan) using a 532 nm excitation wavelength. The  
49 compressive mechanical properties of the hydrogels were tested using a universal  
50 testing machine (UTM4103, China).

51

## 52 **Solar Vapor Generation (SVG) Test**

53 The solar-driven water evaporation performance was evaluated under simulated  
54 sunlight using a xenon lamp (PLS-SXE 300+, Perfectlight, China), which provided an  
55 output power equivalent to one sun (1 kW m<sup>-2</sup>). The illumination intensity was  
56 monitored and calibrated using a connected power meter (PLD MOPM-I, Perfectlight,  
57 China). During testing, a CPC-UA hydrogel sample with a thickness of approximately  
58 1 cm was placed on a polystyrene (PS) foam support within a beaker. The water in the  
59 beaker was either deionized water or contaminated water (used for purification  
60 experiments). A laboratory electronic balance with a resolution of 0.1 mg (JA2003,  
61 Soptop) was used to record the mass loss of bulk water. All experiments were conducted  
62 under controlled environmental conditions: an ambient temperature of 21 °C and  
63 relative humidity of 25 %. The evaporation rate was measured after the system reached  
64 a steady state under one sun illumination for 30 minutes. Outdoor evaporation  
65 experiments were performed at the Binhai Campus of Tianjin University of Science  
66 and Technology from July 7 to July 9. The solar-to-vapor energy conversion efficiency  
67 ( $\eta$ , %) was calculated using the following equation:

$$68 \quad \eta = \frac{mh_{water}}{3600I} \quad (S1)$$

69 where  $m$  (kg m<sup>-2</sup> h<sup>-1</sup>) is the net evaporation rate after subtracting the dark evaporation  
70 rate,  $h_{water}$  (kJ kg<sup>-1</sup>) is the enthalpy of water evaporation, and  $I$  (kW m<sup>-2</sup>) is the incident  
71 solar irradiance.

72

## 73 **Contact Angle (CA) Measurement**

74 The wettability of the hydrogel samples was evaluated using an optical contact  
75 angle goniometer (Dataphysics, Germany). A 5  $\mu$ L droplet of deionized water was  
76 deposited onto the hydrogel surface, and the spreading and absorption processes were  
77 recorded by a high-speed camera. The reported contact angle (CA) values represent the  
78 average of three measurements taken at different positions on each hydrogel surface.  
79

#### 80 **Photothermal Performance Test**

81 The photothermal properties of different samples were evaluated under one sun  
82 irradiation using a xenon lamp (PLS-SXE 300+, Perfectlight, China). During  
83 illumination, the surface temperature of each sample was monitored in real time using  
84 an infrared thermal imaging camera (H10, HIKVISION).  
85

#### 86 **Mechanical Compression Test**

87 The compressive properties of the hydrogel samples were evaluated using a  
88 universal testing machine (UTM4103, China) at a loading rate of 1 mm/s. The stress-  
89 strain behavior was recorded under varying strain conditions.  
90

#### 91 **Salt Tolerance and Performance in Dye and Acid/Base Solutions**

92 To simulate seawater with different salinities, NaCl solutions with varying  
93 concentrations (3.5, 7, 10, 15, 20, and 25 wt%) were prepared. The evaporation devices  
94 containing different hydrogel samples were placed in these solutions for testing.

95 For organic pollutant removal tests, three typical industrial dyes—methylene blue  
96 (MB), methyl orange (MO), and rhodamine B (RhB) were each dissolved to form 2  
97 vol% solutions. Additionally, 1 mol/L NaOH and 1 mol/L HCl solutions were prepared  
98 to evaluate the chemical stability of the hydrogels under strong alkaline and acidic  
99 conditions. The evaporation performance was tested following the same procedures as  
100 described above, with the saline solution replaced by the corresponding test liquids.

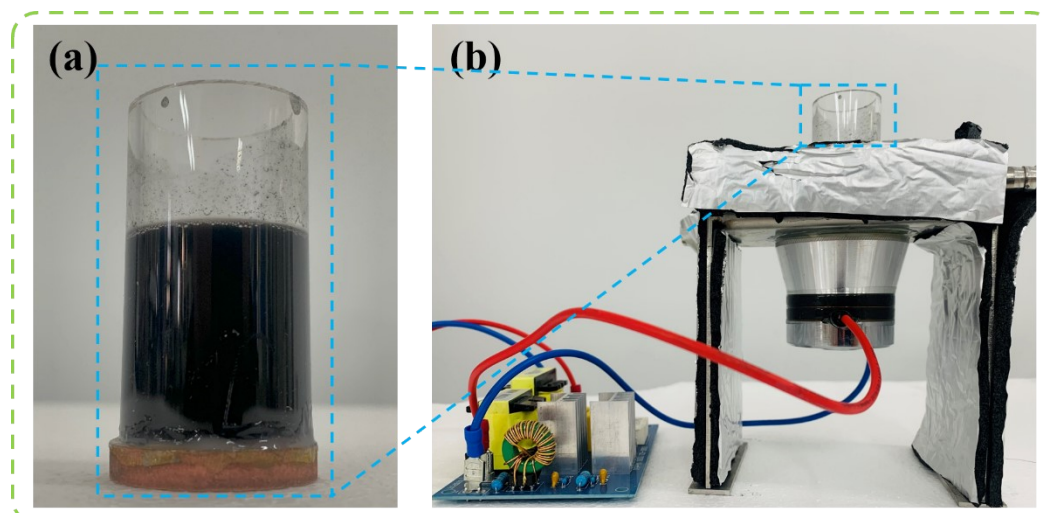

102  
 103 **Figure S1.** (a) Photograph of the mold containing hydrogel. (b) Photograph of the  
 104 directional freezing apparatus.

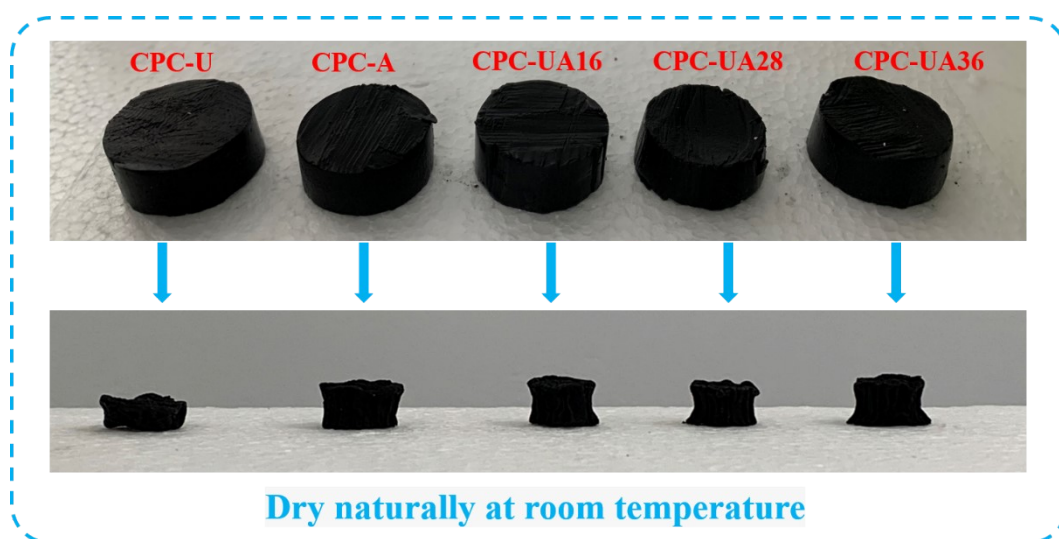

105  
 106 **Figure S2.** Photographs of hydrogel samples before and after drying at room  
 107 temperature.

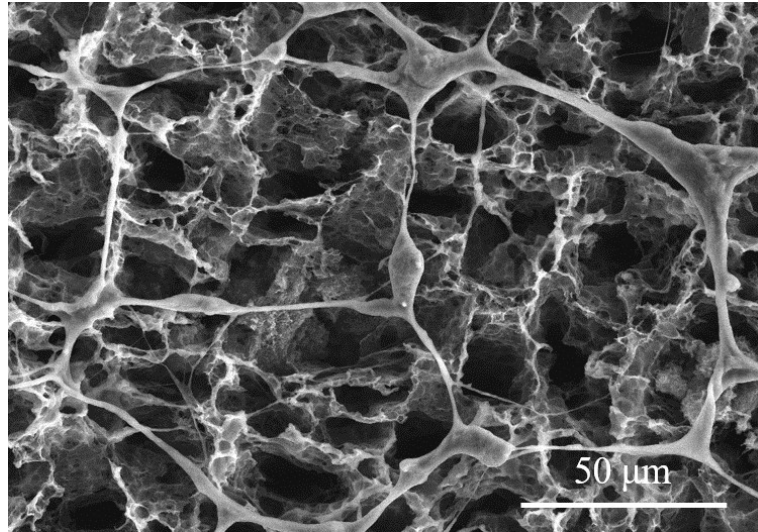

108

109 **Figure S3.** SEM images of hydrogels prepared by ultrasound-assisted directional  
110 freezing.

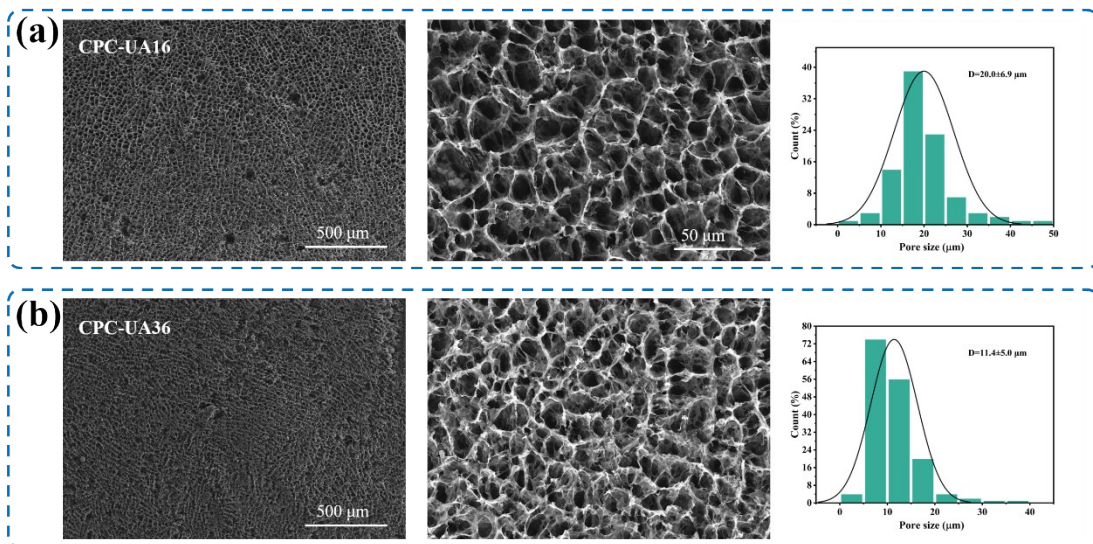

111

112 **Figure S4.** (a) SEM micrograph and pore size distribution of CPC-UA16. (b) SEM

113

micrograph and pore size distribution of CPC-UA



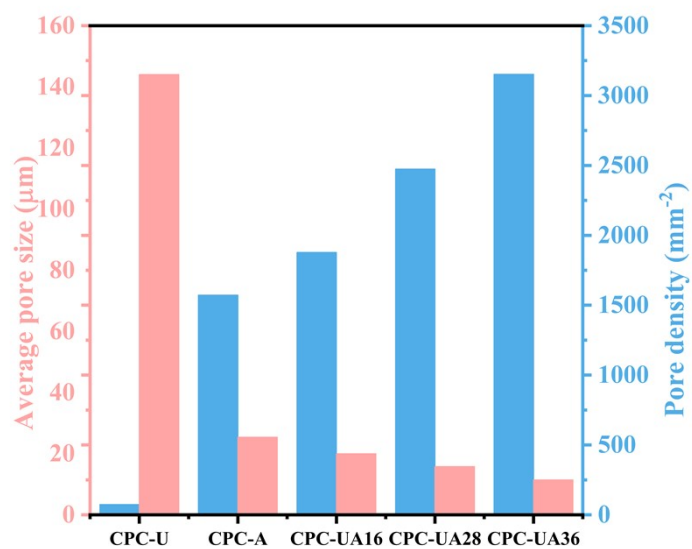

114

115 **Figure S5.** Pore size distribution and pore density of the hydrogels.

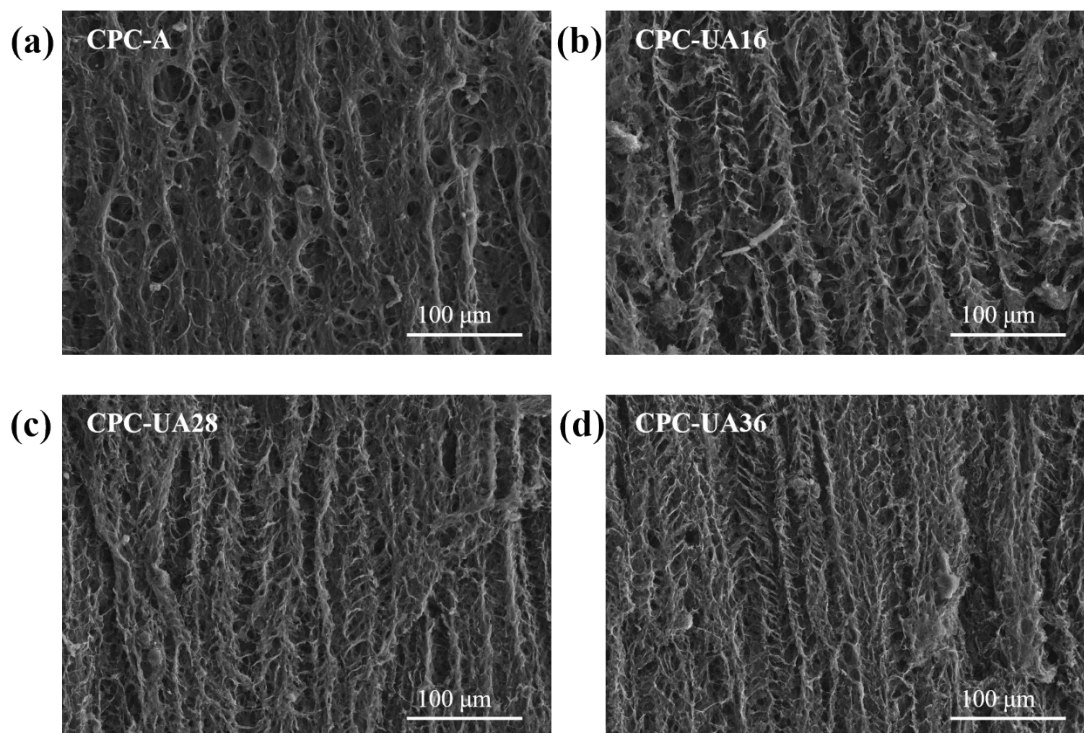

116

117 **Figure S6.** SEM cross-sectional images of vertically sliced hydrogels: (a) CPC-A, (b)

118 CPC-UA16, (c) CPC-UA28, (d) CPC-UA36.

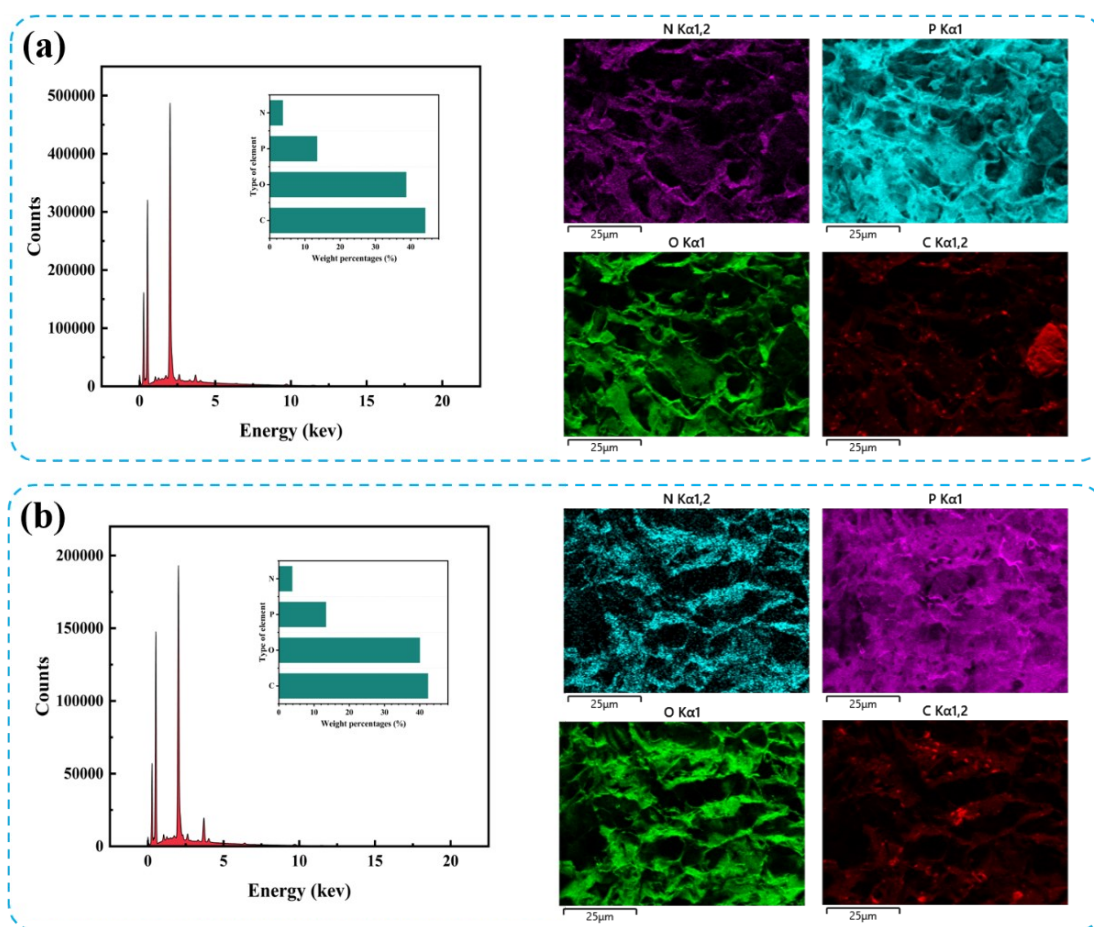

119

120 **Figure S7.** (a) EDS mapping and elemental distribution of CPC-A. (b) EDS mapping  
121 and elemental distribution of CPC-UA28.

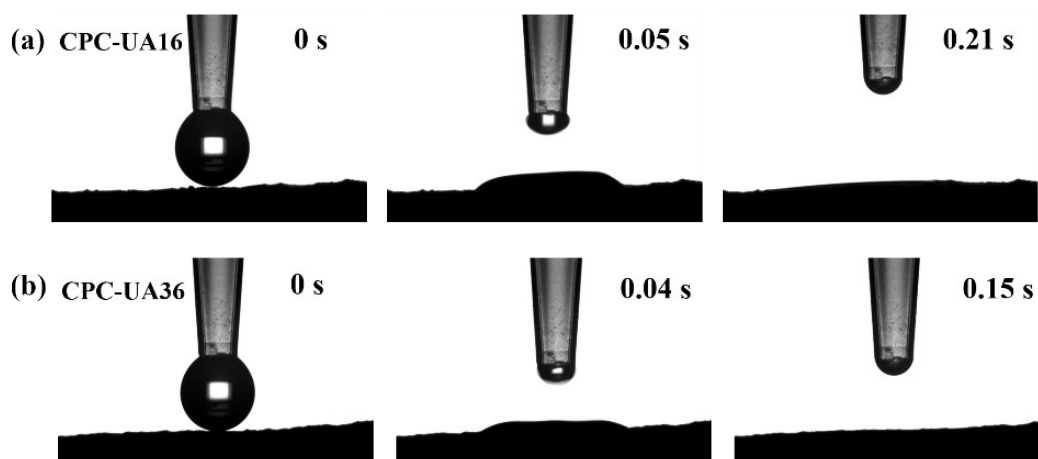

122

123 **Figure S8.** Contact angle images of: (a) CPC-UA16, (b) CPC-UA36.



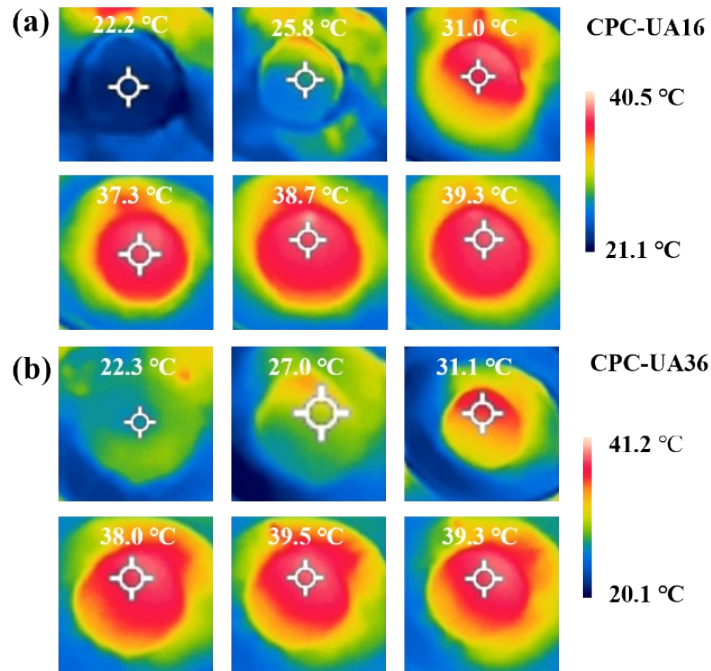

124

125 **Figure S9.** Infrared thermographic images of: (a) CPC-UA16, (b) CPC-UA36.

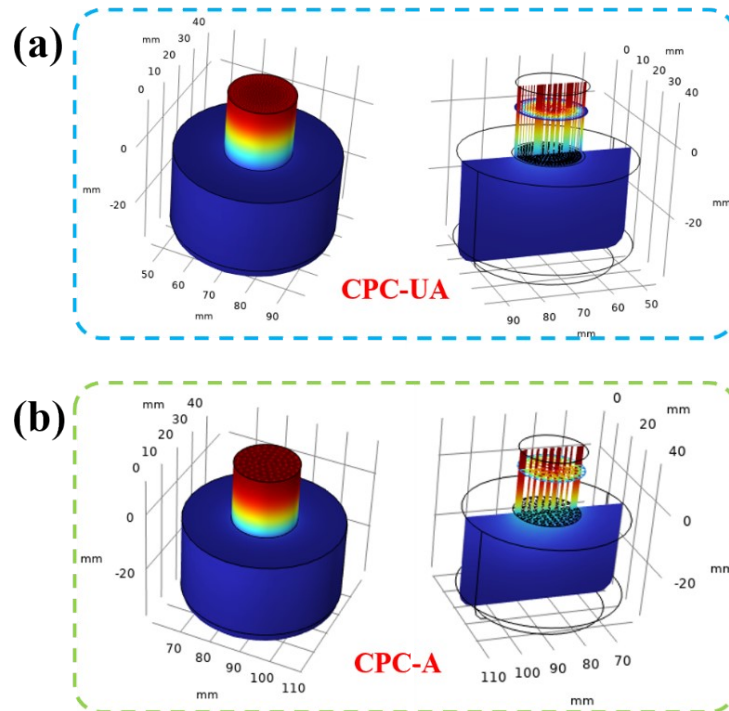

126

127 **Figure S10.** (a, b) Simulated temperature distribution and cross-sectional view of CPC-  
128 UA and CPC-A by COMSOL.

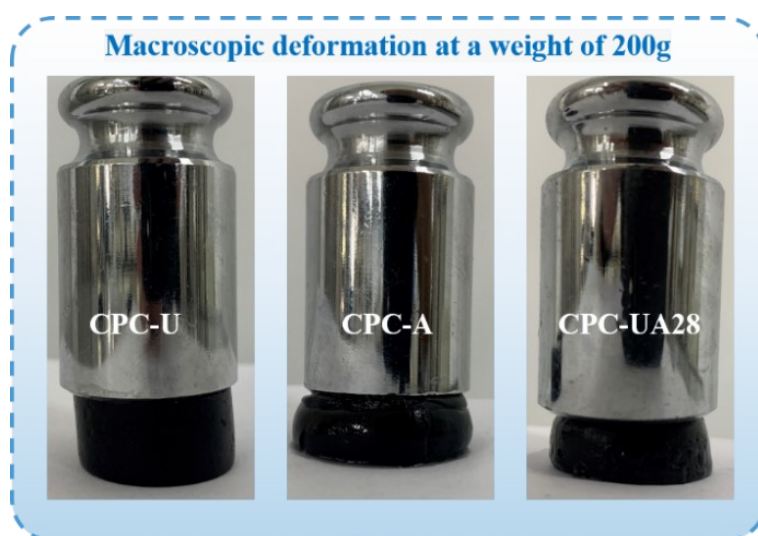

129

130 **Figure S11.** Macroscopic compression images of CPC-U, CPC-A, and CPC-UA28.

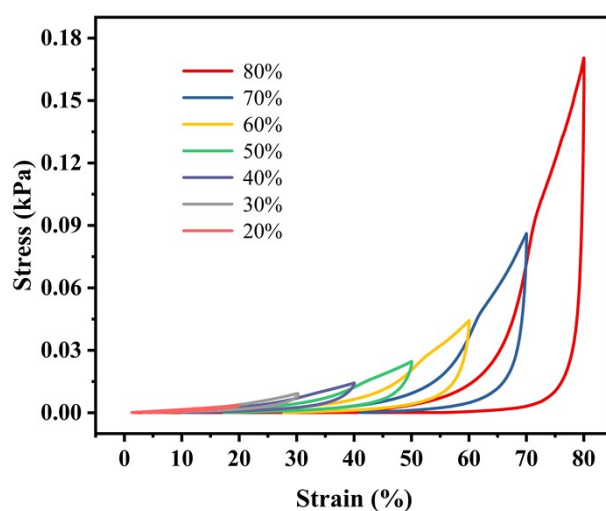

131

132 **Figure S12.** Stress–strain curves of CPC-UA28 under loading and unloading with

133 strain increments of 10% up to 80%.

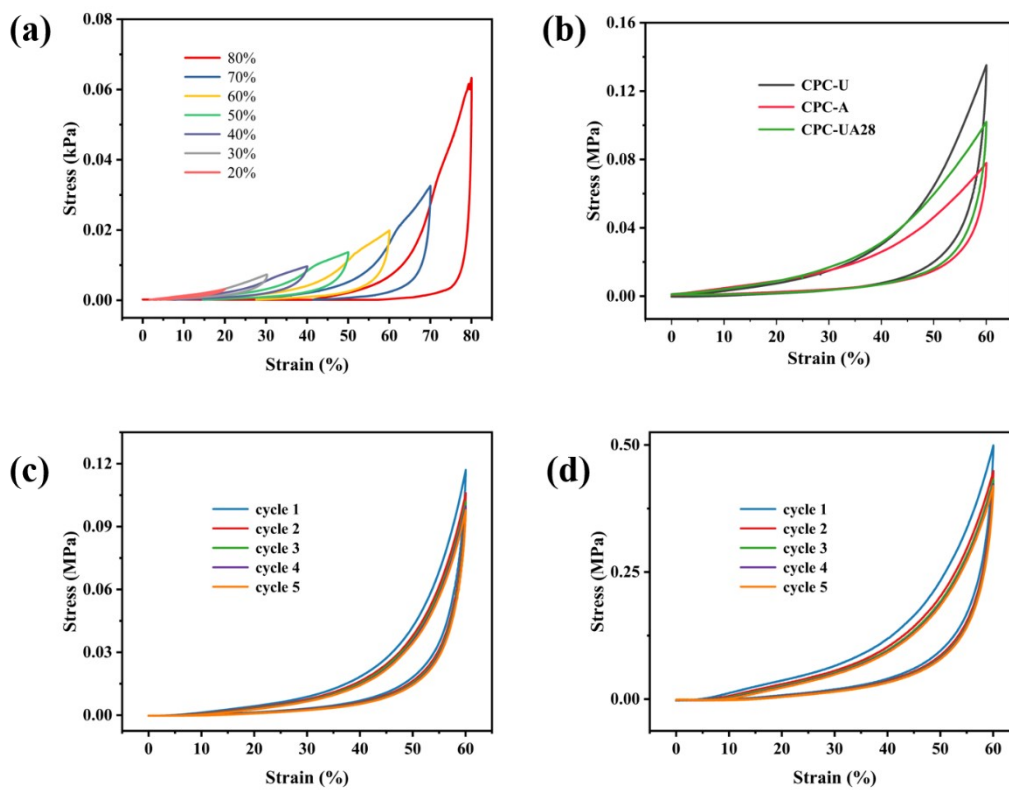

134

135 **Figure S13.** (a) Stress–strain curves of CPC-A under stepwise loading/unloading from  
 136 10% to 80% strain. (b) Comparison of compressive stress–strain curves of CPC-U,  
 137 CPC-A, and CPC-UA28 under 0-60% strain. (c) Cyclic compressive stress–strain  
 138 curves of CPC-U at a fixed strain of 60%. (d) Cyclic compressive stress–strain curves  
 139 of CPC-A at a fixed strain of 60%.

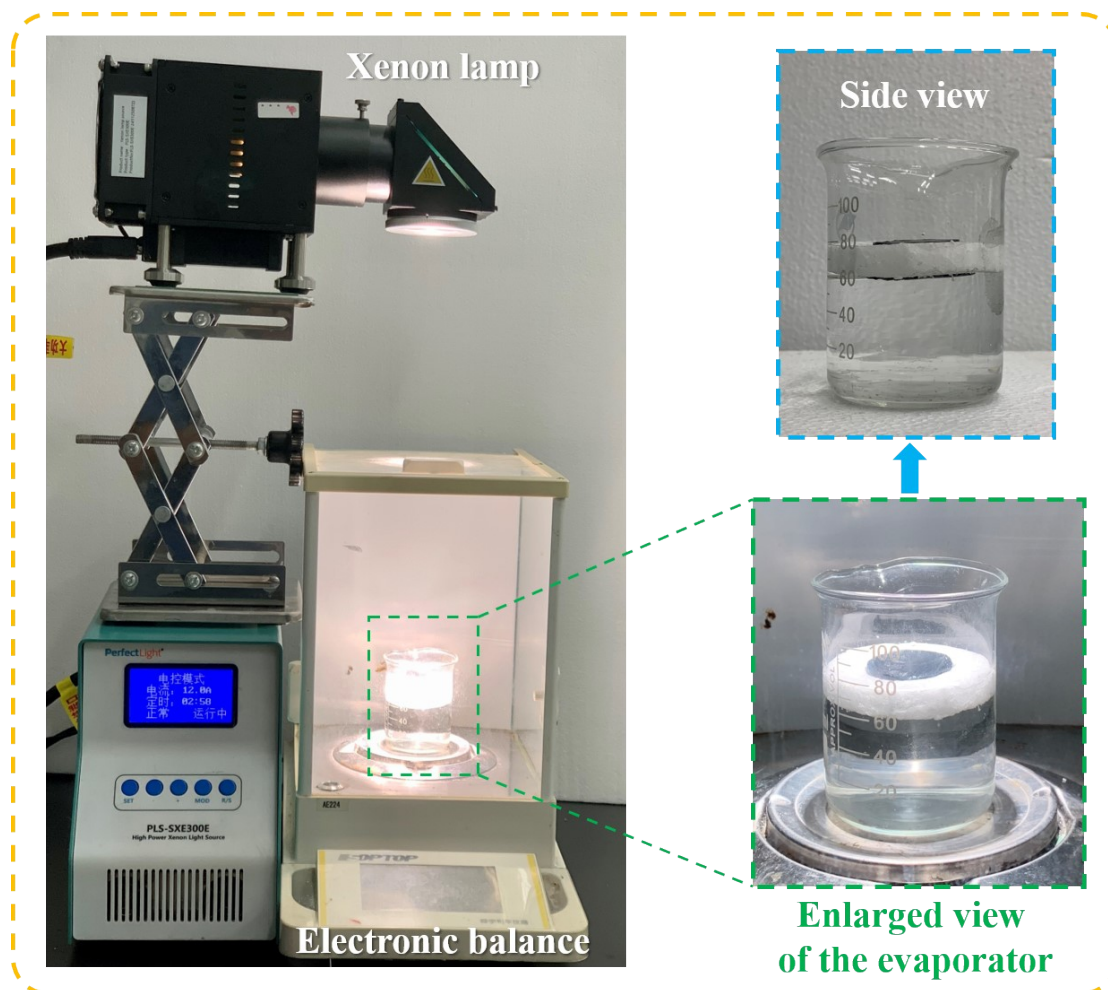

140

141 **Figure S14.** Photographs of the indoor test setup and interfacial evaporation system.

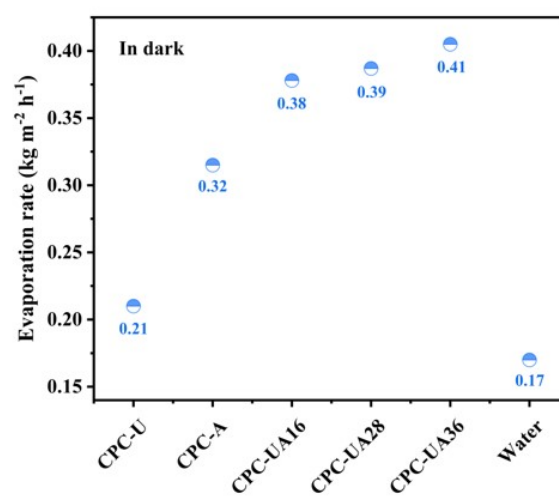

142

143 **Figure S15.** Evaporation rates of various hydrogels under dark conditions.

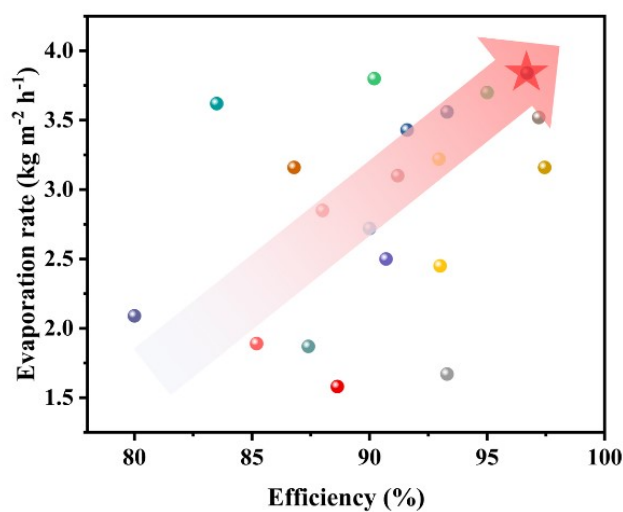

144

145 **Figure S16.** Comparison of evaporation rate and solar evaporation efficiency of  
 146 different hydrogels under 1 sun illumination.

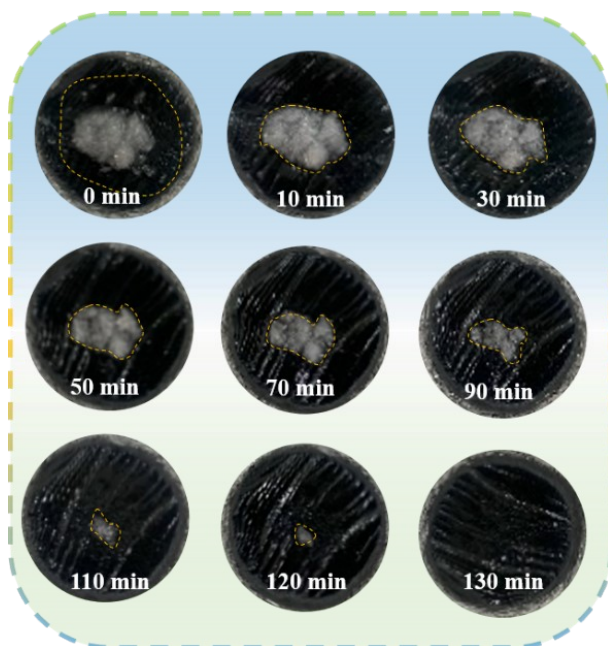

147

148 **Figure S17.** Dissolution process of 1 g NaCl on the surface of CPC-UA28 hydrogel.

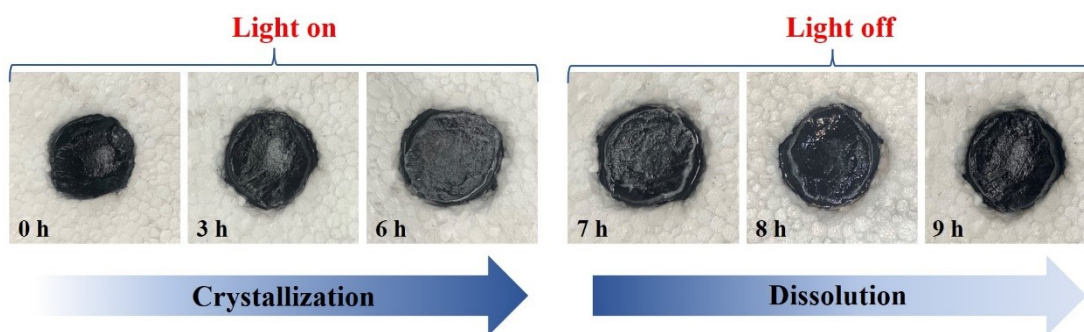

149

150 **Figure S18.** Photographs of salt crystallization and dissolution on CPC-UA36 during



151 evaporation in 25 wt% saline water under one-sun illumination.

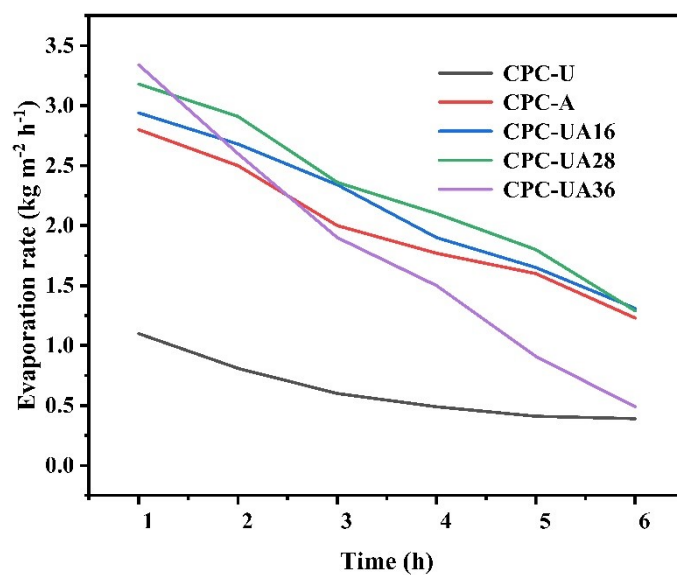

152

153 **Figure S19.** Variation of evaporation rates of different hydrogels in 25 wt% saline

154 water under one-sun illumination.

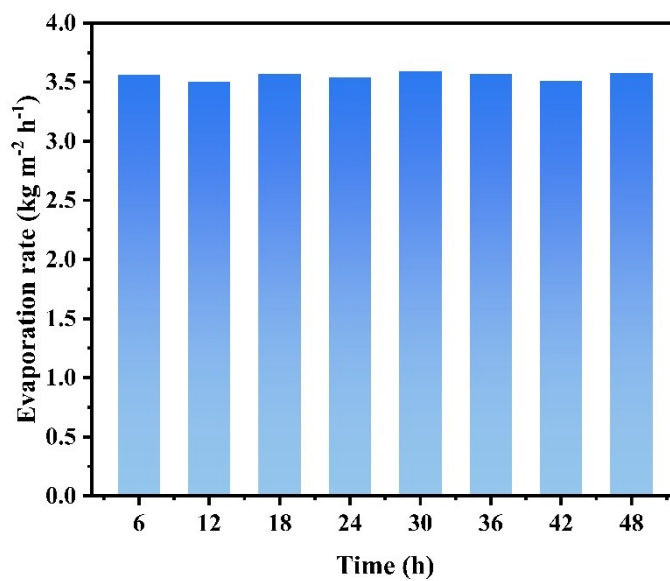

155

156 **Figure S20.** Evaporation rate variation of CPC-UA28 during continuous 48 h

157 seawater evaporation under one-sun illumination.



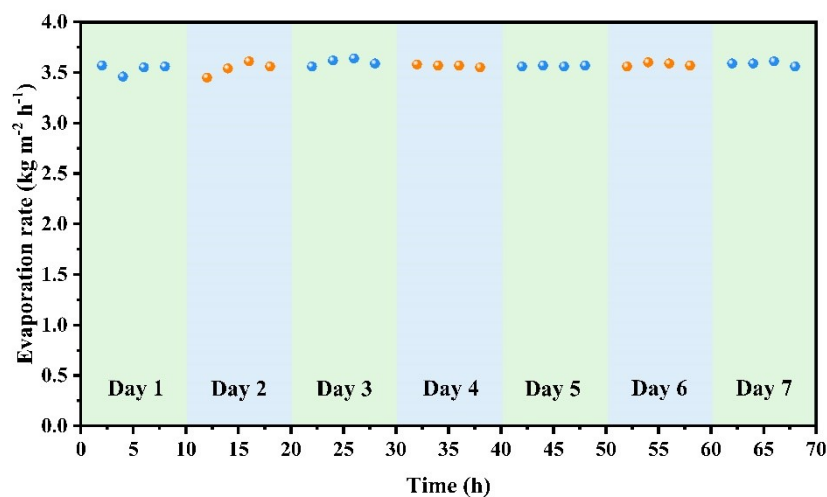

158

159 **Figure S21.** Seven-day cycling stability test of CPC-UA28 in seawater under one-sun  
 160 illumination, with each cycle lasting 8 h.

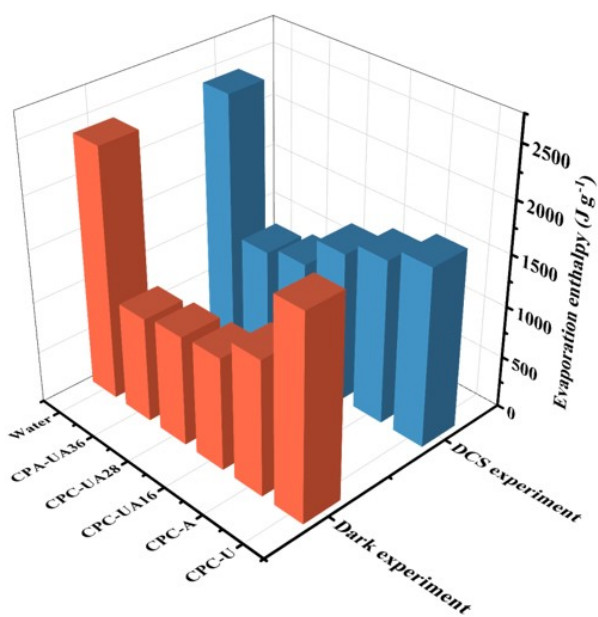

161

162 **Figure S22.** Comparison between DSC-derived evaporation enthalpy and dark-  
 163 condition-derived evaporation enthalpy of various hydrogels.

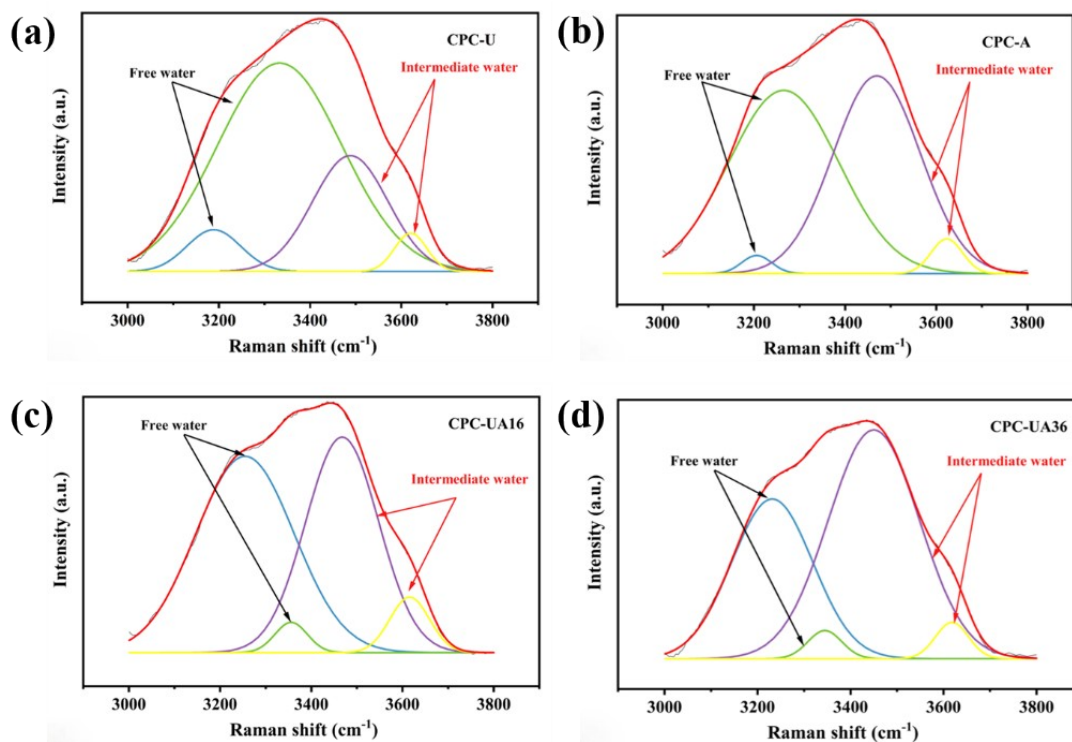

164

165 **Figure S23.** Raman spectra of: (a) CPC-U, (b) CPC-A, (c) CPC-UA16, (d) CPC-UA36.

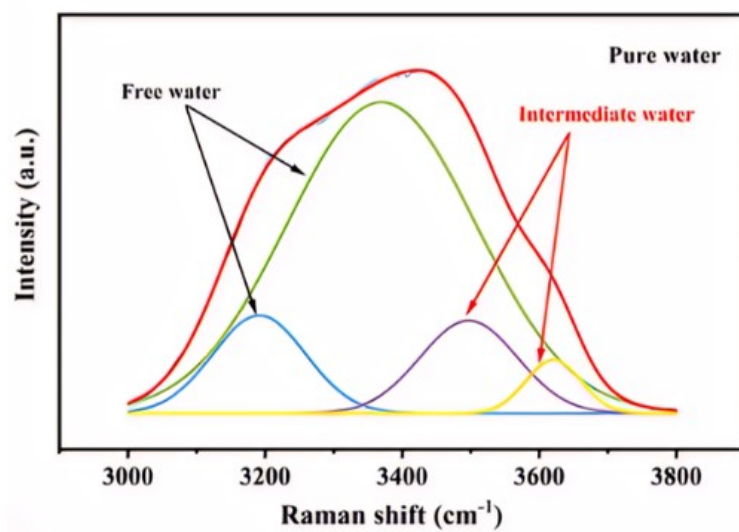

$$\text{IW/FW} = 0.1768$$

166

167 **Figure S24.** Raman spectrum of pure water and the IW/FW ratio.

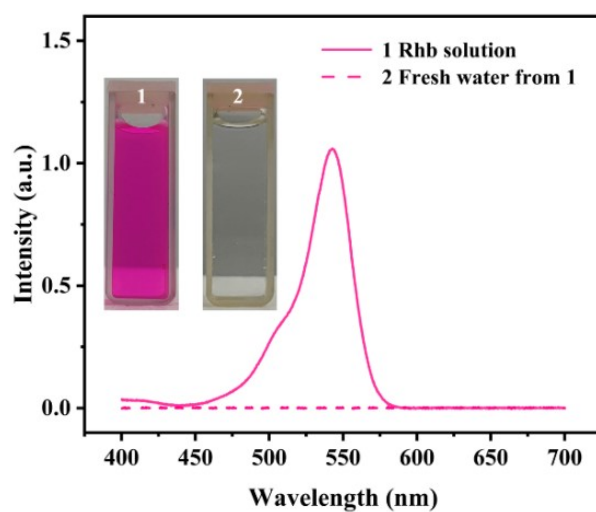

168

169 **Figure S25.** UV-vis absorption spectra of Rhodamine B (RhB) contaminated water and  
 170 the collected distilled water.

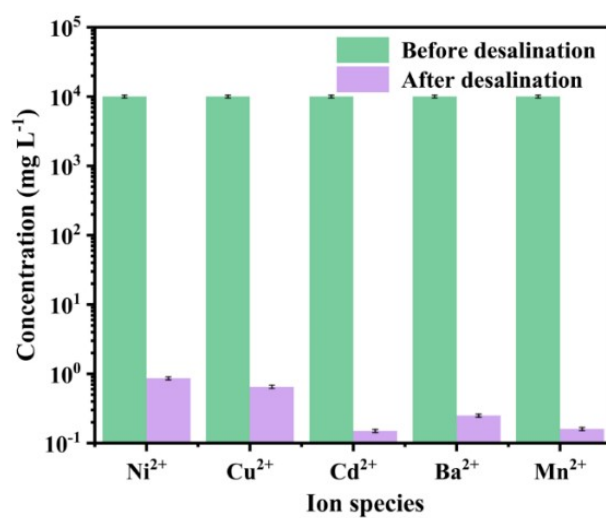

171

172 **Figure S26.** Heavy metal ion concentrations in simulated wastewater before and after  
 173 solar desalination.

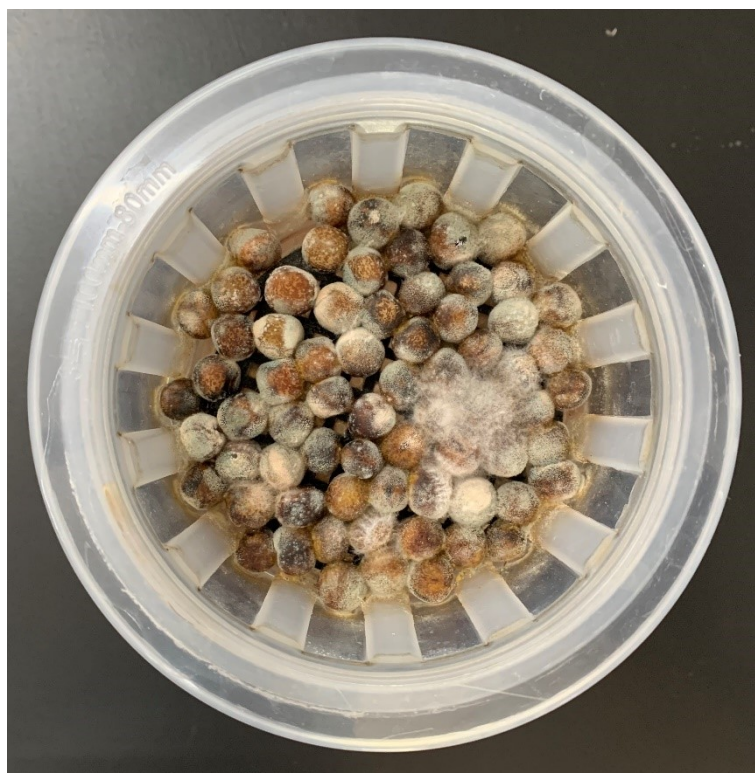

174

175 **Figure S27.** Photograph of mildew in peas farmed with seawater.

176

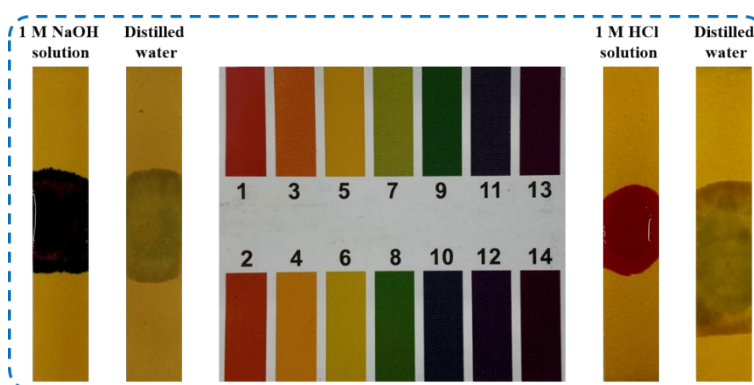

177

178 **Figure S28.** Photographs showing the pH values of 1 M NaOH, 1 M HCl, and distilled

179 water.

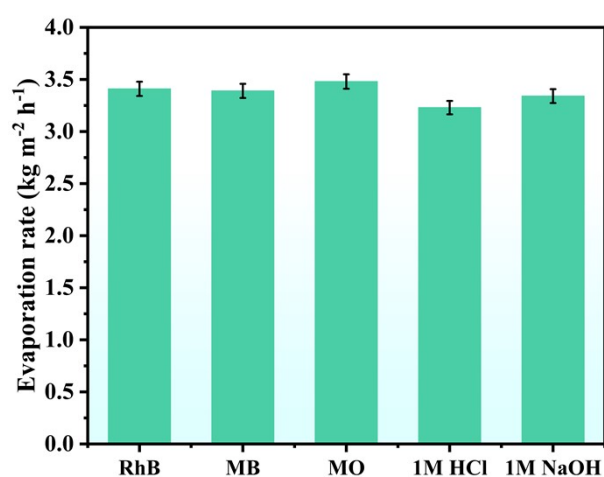

180

181 **Figure S29.** Evaporation rates of CPC-UA28 in different dye wastewater and acid/base  
182 solutions.

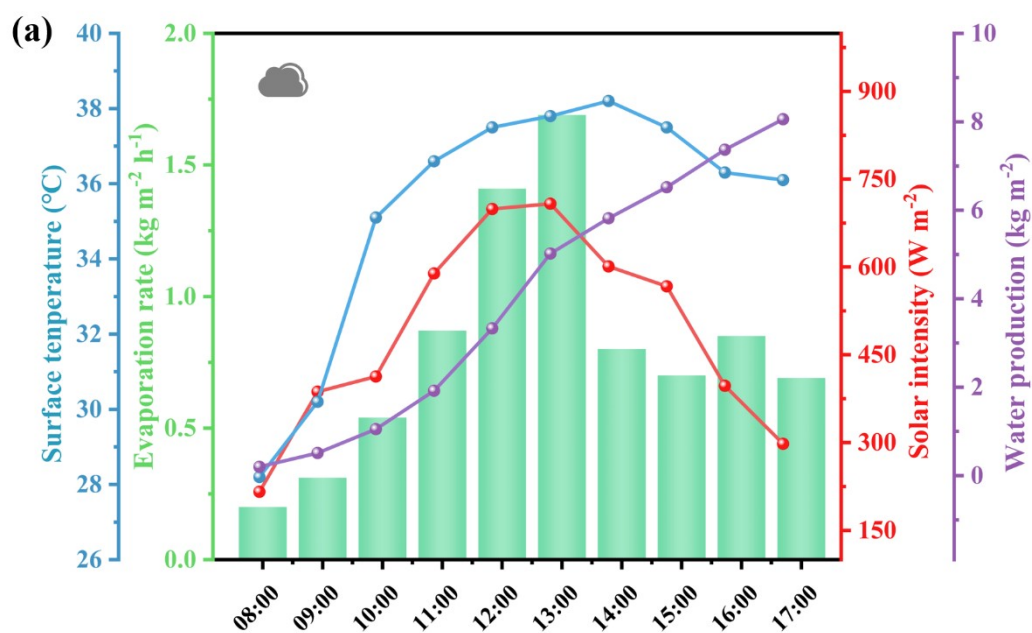

183

184

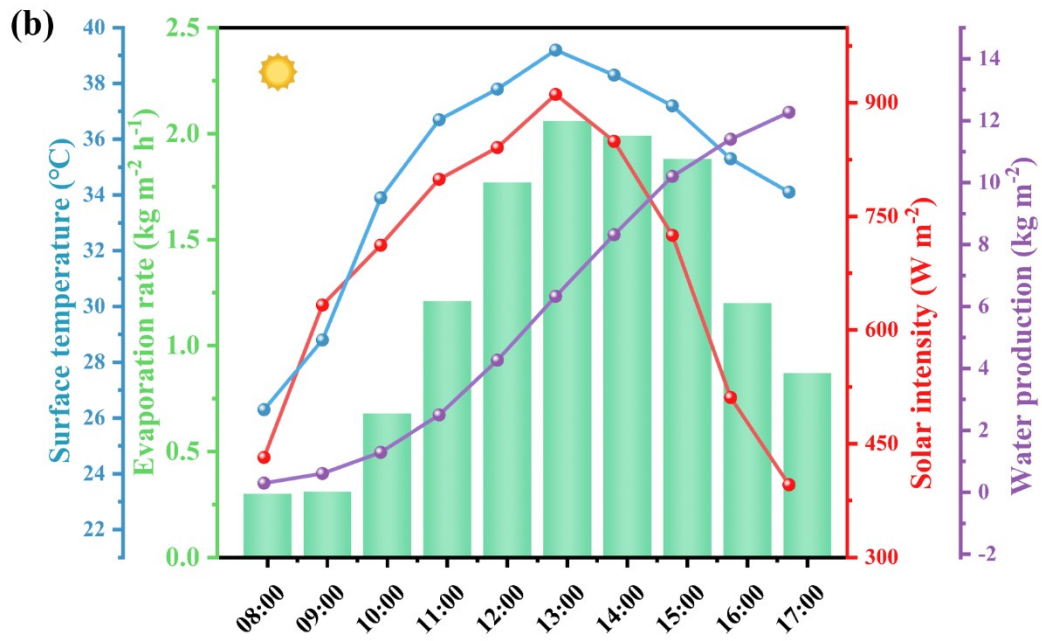

185

186 **Figure S30.** In the outdoor experiments on July 8 (a) and 9 (b), 2025, CPC-UA28

187 recorded freshwater production, cumulative freshwater production, surface

188 temperature, evaporation rate, and light intensity.

189



190 **Table S1 Tensile mechanical properties of hydrogels.**

191

| Name     | Tensile strength(MPa) | Elastic modulus(MPa) | Elongation at break(%) |
|----------|-----------------------|----------------------|------------------------|
| CPC-U    | 0.08                  | 0.06                 | 135.2                  |
| CPC-A    | 0.11                  | 0.08                 | 176.4                  |
| CPC-UA28 | 0.13                  | 0.09                 | 181.9                  |

192

193 **Table S2 Comparison of Evaporation Rate and Efficiency of CPC-UA28 with**  
 194 **Reported Hydrogel-Based Evaporators under One Sun Irradiation.**

195

| Entry | Photothermal material                                  | Evaporation rate<br>(kg m <sup>-2</sup> h <sup>-1</sup> ) | Efficiency<br>(%) | Reference<br>in SI |
|-------|--------------------------------------------------------|-----------------------------------------------------------|-------------------|--------------------|
| 1     | Directed ultrasound freezing<br>of CB/PVA-CS hydrogels | 3.84                                                      | 96.7              | This work          |
| 2     | CB/Nano-silica PVA-CS                                  | 1.58                                                      | 88.63             | [1]                |
| 3     | AC/Janus PVA-AG                                        | 3.56                                                      | 93.3              | [2]                |
| 4     | 3D LSC5/PVA-CS                                         | 2.45                                                      | 93.0              | [3]                |
| 5     | CNTs-PVA/TOCNFs/SLS                                    | 3.70                                                      | 95.0              | [4]                |
| 6     | Carbon nanotube PVA/SLS                                | 2.09                                                      | 80.0              | [5]                |
| 7     | PVA/CS/GO-Ag-4%EfMs                                    | 1.67                                                      | 93.3              | [6]                |
| 8     | PVA biochar hydrogels                                  | 1.89                                                      | 85.2              | [7]                |
| 9     | Janus PSPH@CP                                          | 2.72                                                      | 90.0              | [8]                |
| 10    | CNTs and Chinese ink<br>cellulose/PVA                  | 3.16                                                      | 86.79             | [9]                |
| 11    | MXene/rGO-embedded                                     | 3.62                                                      | 83.5              | [10]               |

|    |                                           |      |       |      |
|----|-------------------------------------------|------|-------|------|
|    | hybrid hydrogels                          |      |       |      |
|    | $\delta$ -MnO <sub>2</sub> -PVA composite |      |       |      |
| 12 | hydrogels                                 | 2.5  | 90.7  | [11] |
| 13 | PVA-CB                                    | 3.52 | 97.2  | [12] |
| 14 | MWCNTs/PVA-agar                           | 3.1  | 91.2  | [13] |
| 15 | 3D-GO/PVA                                 | 1.87 | 87.4  | [14] |
| 16 | 3D PVA/PDA                                | 3.16 | 97.45 | [15] |
|    | PVA fabric interpenetrating               |      |       |      |
| 17 | composite hydrosponges                    | 2.85 | 88    | [16] |
| 18 | ACNTs-PDA/PVA PPCHs                       | 3.43 | 91.6  | [17] |
| 19 | MoS <sub>2</sub> -PVA/P(SA)               | 3.22 | 92.95 | [18] |
| 20 | CNPs-PVA/CS                               | 3.80 | \     | [19] |

196

197 **Table S3 Average pore size and salt crystallization rate of different hydrogels.**

198

| Name     | Pore structure        | Average pore size( $\mu$ m) | Salt Accumulation                                                                    |
|----------|-----------------------|-----------------------------|--------------------------------------------------------------------------------------|
| CPC-U    | Random Porous Network | 144                         |  |
| CPC-A    | Vertical Channel      | 25.36                       |  |
| CPC-UA16 |                       | 19.97                       |  |
| CPC-UA28 |                       | 15.79                       |  |

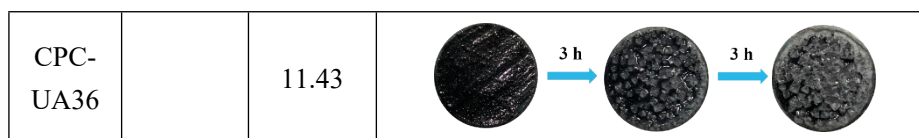

199

200 **Table S4 Comparison of Enthalpy of Vaporization Measured by DSC and**  
 201 **Estimated from Dark Evaporation Experiments.**

202

| Evaporation<br>enthalpy(J/g) | CPC-U  | CPC-A  | CPC-<br>UA16 | CPC-<br>UA28 | CPC-<br>UA36 | Pure<br>water |
|------------------------------|--------|--------|--------------|--------------|--------------|---------------|
| DSC<br>measurement           | 1726.1 | 1588.2 | 1447.7       | 1148.6       | 1069.9       | 2375          |
| Dark<br>experiment           | 1956.6 | 1304.4 | 1087         | 1061.7       | 1014.5       | 2417          |

203

204 **Note S1 Calculation of Dark Evaporation Enthalpy**

205 Since all CPC-series hydrogels are nearly fully hydrated during the solar-driven  
 206 interfacial evaporation process, the energy required for water evaporation primarily  
 207 includes the vaporization enthalpy of free water and intermediate water, which is  
 208 theoretically lower than the value for bulk water. To determine the dark evaporation  
 209 enthalpy, we designed a control experiment in which each hydrogel sample and pure  
 210 water (with identical exposed evaporation areas) were placed in sealed, completely dark  
 211 containers. The environmental conditions were maintained at a constant humidity of  
 212 25% and temperature of 21°C. The dark evaporation rate of each sample was then used  
 213 to estimate the equivalent evaporation enthalpy. As the total energy input into the pure  
 214 water and hydrogel systems is assumed to be equal in the dark environment, the dark  
 215 evaporation enthalpy of the hydrogels can be calculated using the following equation:

216 
$$U_{in} = h_1 m_1 = h_2 m_2 \quad (S2)$$

217 Where  $h_1$  and  $m_1$  are the evaporation enthalpy and mass loss of pure water, respectively,  
 218  $m_2$  is the mass loss of the hydrogel sample,  $h_2$  is the calculated dark evaporation  
 219 enthalpy of the hydrogel.

220

## 221 **Note S2 Calculation of Heat Loss**

222 In general, heat loss during the interfacial evaporation process consists of three  
223 components: conductive heat loss, convective heat loss, and radiative heat loss. The  
224 calculations are as follows:

### 225 **(1) Conductive heat**

$$226 \quad Q_{cond} = Cm\Delta T_b \quad (S3)$$

227 Where  $Q_{cond}$  is the conductive heat loss,  $C$  is the specific heat capacity of water (4.2 kJ  
228  $^{\circ}\text{C}^{-1} \text{ kg}^{-1}$ ),  $m$  is the mass of water (fixed at 60 g),  $\Delta T_b$  is the temperature rise of the bulk  
229 water.

### 230 **(2) Convective heat**

231 Convective heat loss is calculated based on Newton's law of cooling:

$$232 \quad Q_{conv} = hA\Delta T_c \quad (S4)$$

233 Where  $Q_{conv}$  is the convective heat flux,  $h$  is the convective heat transfer coefficient  
234 (assumed to be  $\sim 5 \text{ W m}^{-2} \text{ K}^{-1}$ ),  $A$  is the evaporation area (fixed at  $0.314 \times 10^{-3} \text{ m}^2$ ),  
235  $\Delta T_c$  is the temperature difference between the material's evaporating surface and the  
236 ambient air just above the absorber.

### 237 **(3) Radiative heat**

238 Radiative heat flux is calculated using the Stefan–Boltzmann equation:

$$239 \quad \Phi = \varepsilon A \sigma (T_1^4 - T_2^4) \quad (S5)$$

240 Where  $\Phi$  is the radiative heat flux,  $\varepsilon$  is the surface emissivity (assumed to be 1 during  
241 evaporation),  $\sigma$  is the Stefan–Boltzmann constant ( $5.67 \times 10^{-8} \text{ W m}^{-2} \text{ K}^{-4}$ ),  $T_1$  is the  
242 steady-state surface temperature of the hydrogel under one sun irradiation,  $T_2$  is the  
243 ambient temperature above the absorber.

244

## 245 **Note S3 COMSOL simulation**

246 The heat transfer process during evaporation in CPC-UA and CPC-A was  
247 simulated using the Heat Transfer Module in COMSOL Multiphysics 6.3. A three-  
248 dimensional model was first constructed in SolidWorks based on the actual dimensions

of the laboratory evaporation device and then imported into COMSOL Multiphysics 6.3 for simulation. A constant solar irradiance of  $1 \text{ kW m}^{-2}$  was applied to the top surface of the evaporator to drive the evaporation process. The inflow water flux into the evaporator was set equal to the outflow caused by evaporation. The boundary conditions were defined as follows: ambient temperature and initial water temperature were both set to  $20 \text{ }^{\circ}\text{C}$  ( $293.15 \text{ K}$ ); the natural convective heat transfer coefficient was set to  $5 \text{ W m}^{-2} \text{ K}^{-1}$ ; and the solar absorption efficiency was set at 95%. The density, specific thermal conductivity of CPC-UA were  $0.2163 \text{ g cm}^{-3}$ ,  $3.137 \text{ J g}^{-1} \text{ K}^{-1}$  and  $0.5097 \text{ W m}^{-1} \text{ K}^{-1}$ , respectively. The density, specific thermal conductivity of CPC-A were  $0.2011 \text{ g cm}^{-3}$ ,  $3.206 \text{ J g}^{-1} \text{ K}^{-1}$  and  $0.4835 \text{ W m}^{-1} \text{ K}^{-1}$ , respectively. Based on these boundary and material parameters, the temperature distribution in the 3D COMSOL model was simulated using the following governing equations:

$$Q_{in} = \rho C_p \frac{\partial T}{\partial t} + \rho C_p u \nabla T + \nabla q \quad (\text{S6})$$

$$q = -k \nabla T \quad (\text{S7})$$

Where  $Q_{in}$  is the heat input from solar radiation,  $\rho$ ,  $C_p$ , and  $k$  are the material's density, specific heat capacity, and thermal conductivity, respectively,  $T(x, t)$  is the local temperature distribution as a function of space and time,  $u$  is the fluid velocity vector,  $q$  is the heat flux vector. The simulation was carried out under a steady-state analysis mode in COMSOL Multiphysics 6.3. Heat convection at the top surface of the evaporator in contact with air was corrected using Newton's law of cooling.

## References

- [1] Chen K, Ma L, Shi J, et al. Fumed nano-silica modified PVA-chitosan composite hydrogel with Janus structure for solar-driven interfacial evaporation[J]. Solar Energy, 2024, 281: 112865.
- [2] Chu A, Yang M, Chen J, et al. Biomass-enhanced Janus sponge-like hydrogel with salt resistance and high strength for efficient solar desalination[J]. Green Energy & Environment, 2024, 9(11): 1698-1710.
- [3] Fan D, Min H, Zhang H, et al. Architecting a bifunctional solar evaporator of

perovskite  $\text{La}_{0.5}\text{Sr}_{0.5}\text{CoO}_3$  for solar evaporation and degradation[J]. Journal of Materials Science, 2021, 56(33): 18625-18635.

[4] Gong X, Hu F, Tang J, et al. Simultaneous realization of efficient solar evaporation and electricity collection through dual regulation of chemical composition and pore channels[J]. Chemical Engineering Journal, 2024, 501: 157595.

[5] Hao L, Liu N, Bai H, et al. High-performance solar-driven interfacial evaporation through molecular design of antibacterial, biomass-derived hydrogels[J]. Journal of colloid and interface science, 2022, 608: 840-852.

[6] Kang Q, Zhai Y, Zhao F, et al. Salt-resistant and antibacterial polyvinyl alcohol/chitosan/silver-loaded graphene oxide electrospun nanofiber membrane for high-efficiency solar-driven desalination[J]. Chemical Engineering Research and Design, 2024, 205: 107-117.

[7] Li J, Yan L, Li X, et al. Porous polyvinyl alcohol/biochar hydrogel induced high yield solar steam generation and sustainable desalination[J]. Journal of Environmental Chemical Engineering, 2022, 10(3): 107690.

[8] Li Q, Chen D, Jiao X. Double-layer Janus sponge evaporator: Optimal balancing between evaporation efficiency and salt resistance[J]. Chemical Engineering Journal, 2025: 160085.

[9] Liu J, Zhu J, Guo S, et al. In-situ constructing cellulose/PVA hydrogel with confinement capillarity for efficient solar interfacial evaporation[J]. Desalination, 2023, 565: 116855.

[10] Lu Y, Fan D, Wang Y, et al. Surface patterning of two-dimensional nanostructure-embedded photothermal hydrogels for high-yield solar steam generation[J]. ACS nano, 2021, 15(6): 10366-10376.

[11] Meera B, Vidhya C, Nair R B, et al. Sustainable sponge-like composite hydrogel evaporator for highly efficient solar steam generation[J]. Materials Today Sustainability, 2023, 23: 100439.

[12] Ren J, Chen L, Gong J, et al. Hofmeister effect mediated hydrogel evaporator for



simultaneous solar evaporation and thermoelectric power generation[J]. Chemical Engineering Journal, 2023, 458: 141511.

[13] Wilson H M, Lim H W, Lee S J. Highly efficient and salt-rejecting poly (vinyl alcohol) hydrogels with excellent mechanical strength for solar desalination[J]. ACS Applied Materials & Interfaces, 2022, 14(42): 47800-47809.

[14] Wu X, Lin D, Zhou H, et al. Salt crystallization on porous asymmetrical graphene oxide-based photothermal hydrogel-fabric unexpectedly enables continuous solar-powered hypersaline water distillation[J]. Carbon, 2025, 233: 119833.

[15] Xiang Y, Sun Y, Li M, et al. Multi-routes of water migration assisted by hierarchical porous structure for boosting solar-driven evaporation[J]. Chemical Engineering Journal, 2025: 160220.

[16] Xu B, Yao X, Zhang X, et al. A fabric interpenetrating composite hydrosponges with permeability and evaporation enthalpy regulation for efficient solar-driven interfacial evaporation and water purification[J]. Chemical Engineering Journal, 2025, 503: 158642.

[17] Yan J, Chen L, Song X, et al. Mechanically robust and anisotropic hydrogel composites for high efficiency steam generation[J]. Colloids and Surfaces A: Physicochemical and Engineering Aspects, 2024, 703: 135256.

[18] Zhao J, Chu A, Chen J, et al. Spongy polyelectrolyte hydrogel for efficient Solar-Driven interfacial evaporation with high salt resistance and compression resistance[J]. Chemical Engineering Journal, 2024, 485: 150118.

[19] Zhu M, Liu X, Tian Y, et al. Dome-arrayed chitosan/PVA hydrogel-based solar evaporator for steam generation[J]. Scientific Reports, 2022, 12(1): 4403.
